# Supplementary material for: Fabrication of monolayers of uniform polymeric particles by inkjet printing of monodisperse emulsions produced by microfluidics
Source: Royal Society of Chemistry journal article supplement (doi:10.1039/c9lc00588a), 2019-01-01
Supplement: c9lc00588a4.pdf [file c9lc00588a4.pdf]

Supporting information:

## Fabrication of Monolayers of Uniform Polymeric Particles by Inkjet Printing of Monodisperse Emulsions Produced by Microfluidics

Yilin Wang, Renhua Deng, Lisong Yang, and Colin D. Bain\*

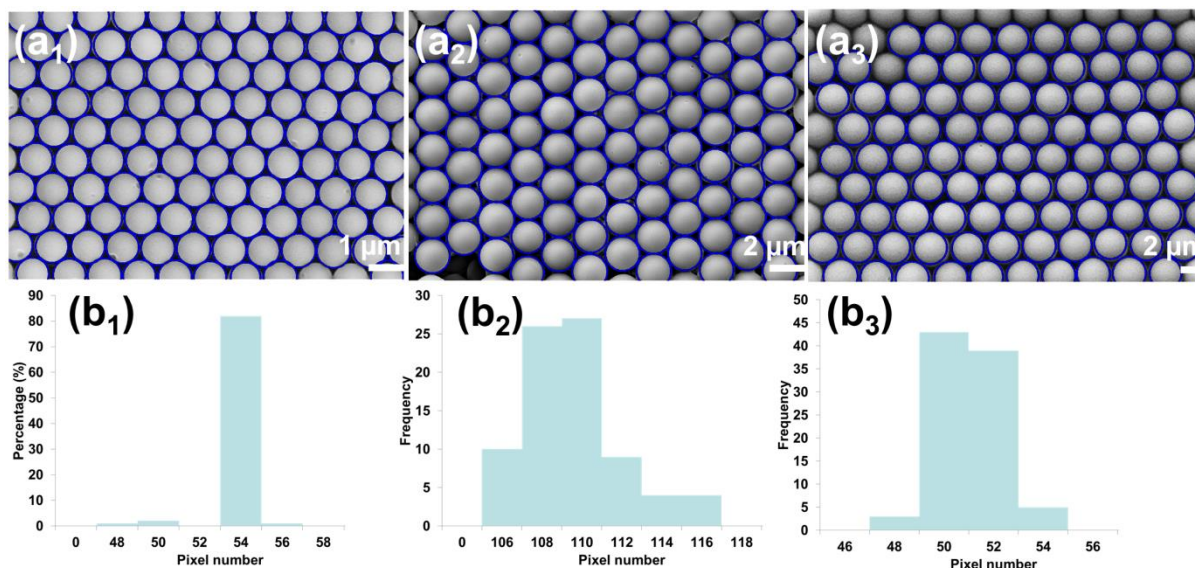

Figure S1. (a) Detected circles of individual particles from the samples in Figures 2c<sub>1</sub>, 2c<sub>2</sub> and 2c<sub>3</sub>, (b) histograms of pixel number from corresponding images, the particle diameter equals to  $2 \times \text{pixel number} \times \text{resolution}$ . As the function of `imfindcircles` in Matlab is limited to integer-level precision, the detected radius is discontinuous.

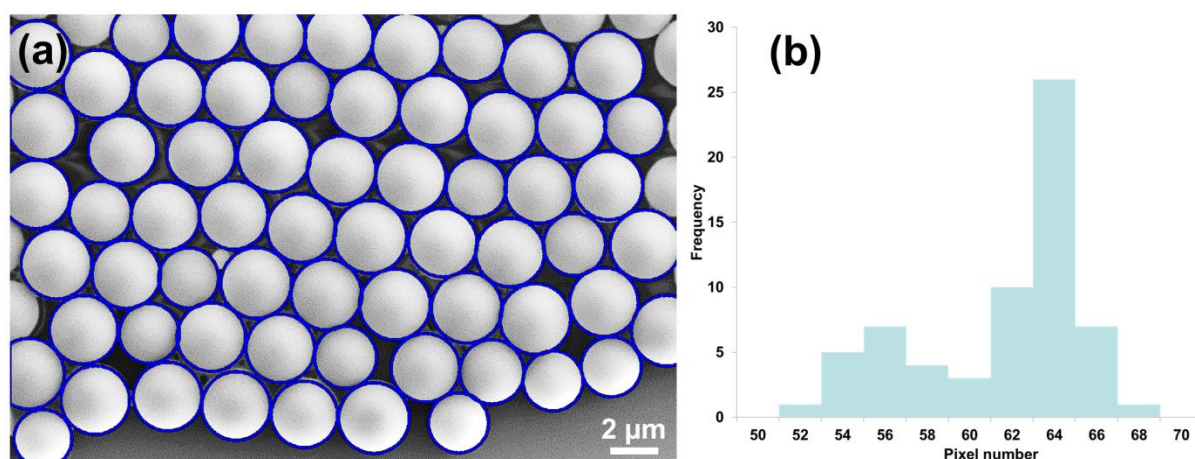

Figure S2. Particle size distribution of the sample in Figure 4a<sub>2</sub> from inkjet-printed emulsion drops dried on a plasma-treated glass coverslip.

Video 1 and 2 shows the bottom view and side view of a printed emulsion droplet ( $66.5 \text{ mg mL}^{-1}$  PS/DCM dispersed in  $1.0 \text{ mg mL}^{-1}$  SDS/water) with 6-μm oil drops on a plasma-treated glass cover slip.
