# Supplementary figures and images for: Fabrication of monolayers of uniform polymeric particles by inkjet printing of monodisperse emulsions produced by microfluidics
Source: Royal Society of Chemistry journal article supplement (doi:10.1039/c9lc00588a), 2019-01-01

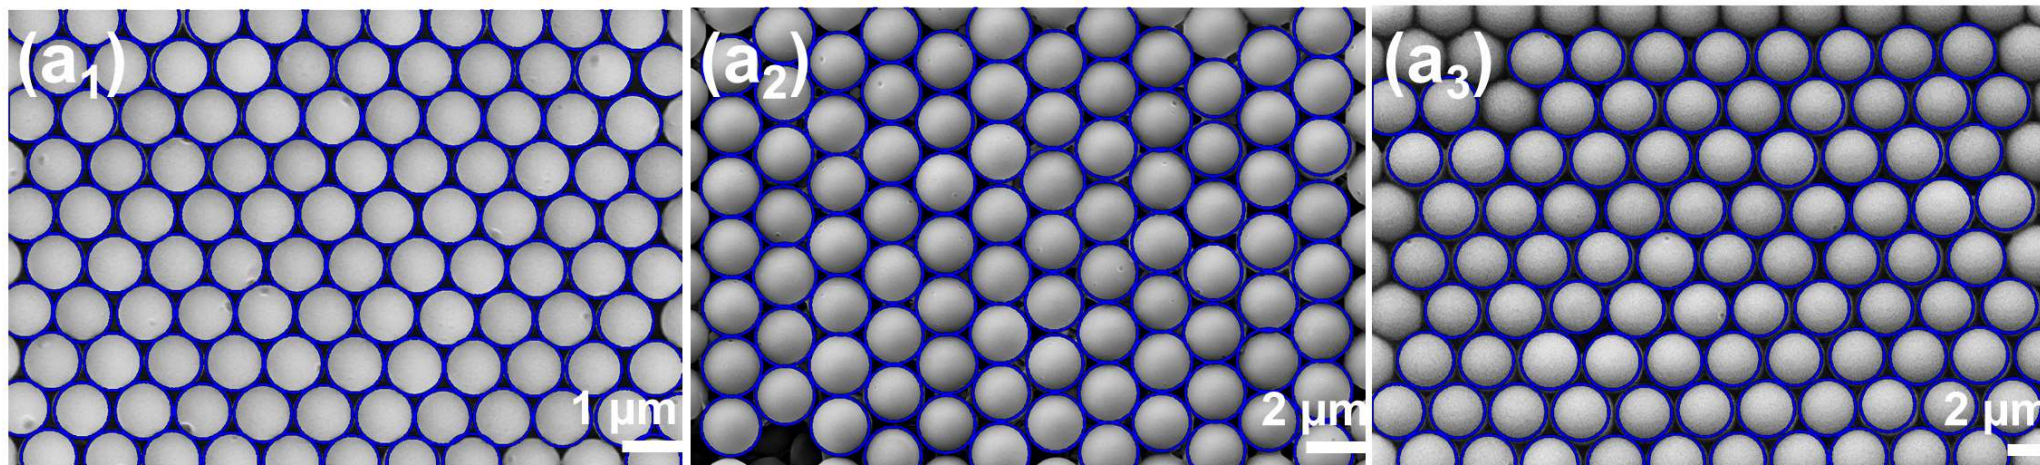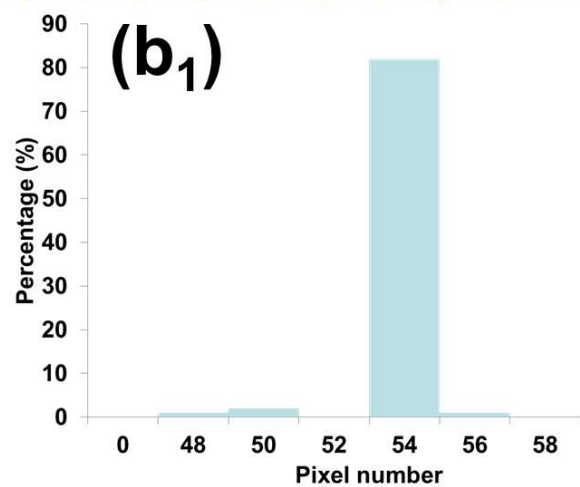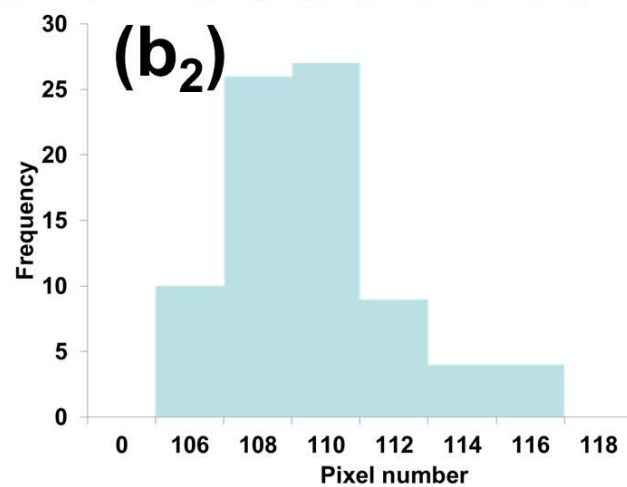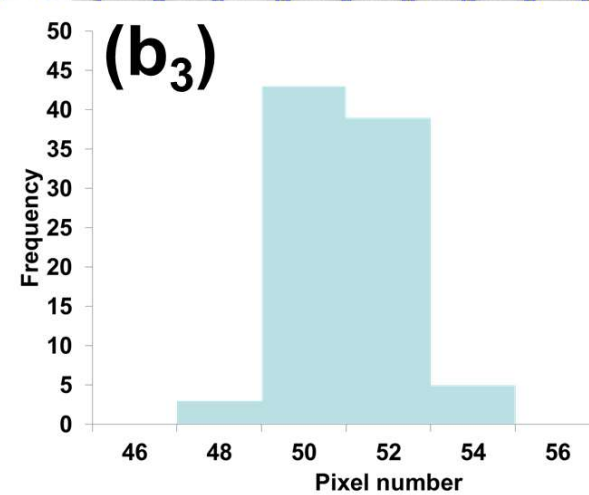

Supplement: c9lc00588a2.pdf [file c9lc00588a2.pdf]

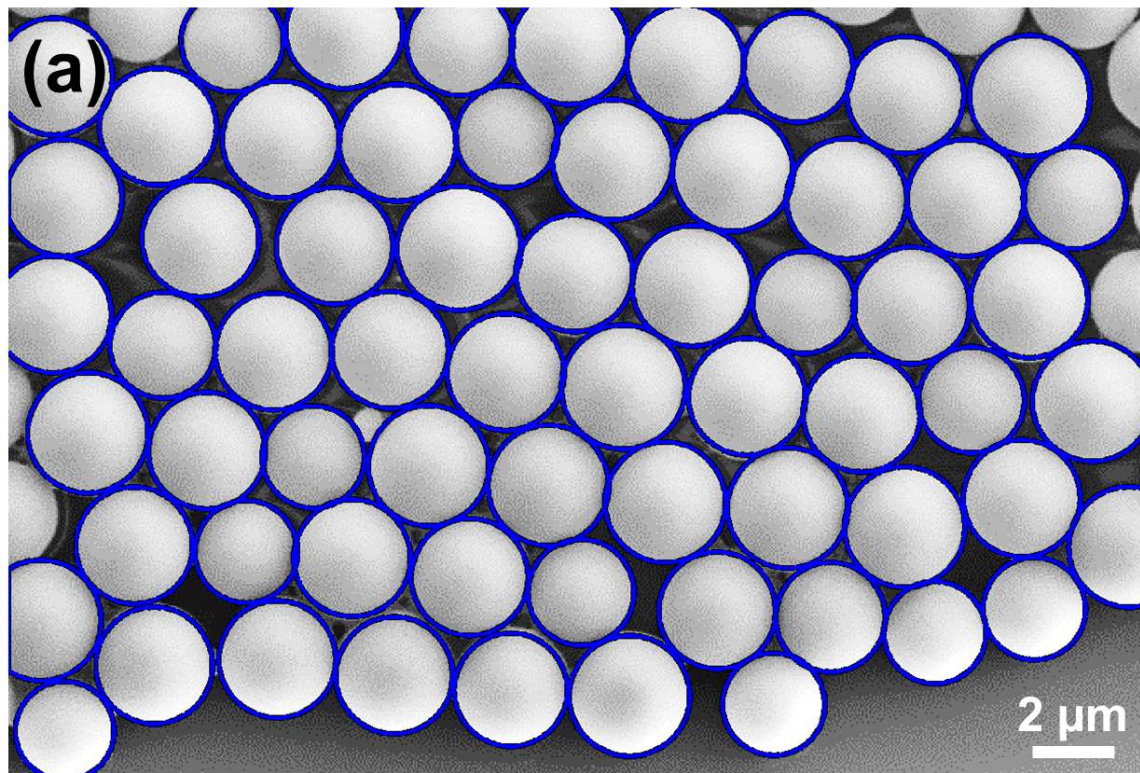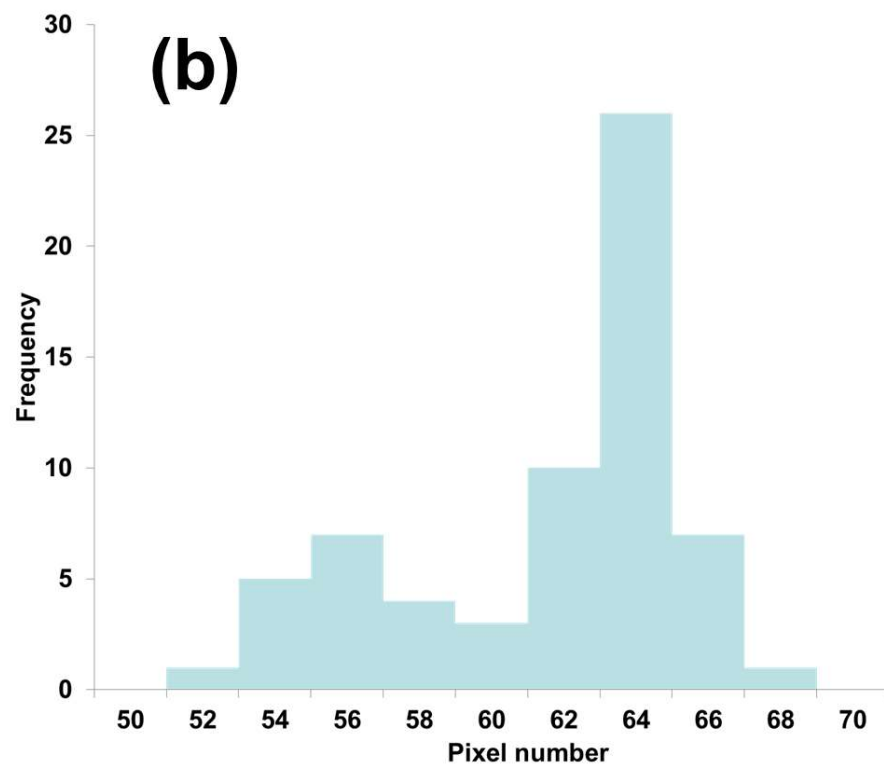

Supplement: c9lc00588a3.pdf [file c9lc00588a3.pdf]
